# Supplementary material for: Music Intervention for Pain Control in the Pediatric Population: A Systematic Review and Meta-Analysis
Source: MDPI journal article supplement (doi:10.3390/jcm11040991), 2022-02-14
Supplement: s1 [file s1]

Supplementary File S1. Reasons for exclusion of 34 articles.

| Authors & Year                | Journal/Book                                     | Title                                                                                                                                                                                                 | Exclusion Reason                       |
|-------------------------------|--------------------------------------------------|-------------------------------------------------------------------------------------------------------------------------------------------------------------------------------------------------------|----------------------------------------|
| Antonacci et al., 2021        | Music Therapy Perspectives                       | Effects of Guitar Accompaniment Patterns on Hospitalized Infants: A Randomized Controlled Trial                                                                                                       | Control group with other interventions |
| Atak et al., 2021             | Journal of PeriAnesthesia Nursing                | The Effect of Different Audio Distraction Methods on Children's Postoperative Pain and Anxiety                                                                                                        | Control group with other interventions |
| Bo et al., 2000               | Pediatrics                                       | Soothing pain-elicited distress in Chinese neonates.                                                                                                                                                  | Insufficient data                      |
| Bush et al., 2021             | American Journal of Critical Care                | Effect of Live Versus Recorded Music on Children Receiving Mechanical Ventilation and Sedation                                                                                                        | Control group with other interventions |
| Butt et al., 2000             | Canadian Journal of Nursing Research Archive     | Music modulates behaviour of premature infants following heel lance.                                                                                                                                  | Insufficient data                      |
| Calcaterra et al., 2014       | Pediatric reports                                | Music benefits on postoperative distress and pain in pediatric day care surgery                                                                                                                       | Insufficient data                      |
| Caprilli et al., 2007         | Journal of Developmental & Behavioral Pediatrics | Interactive music as a treatment for pain and stress in children during venipuncture: a randomized prospective study.                                                                                 | Insufficient data                      |
| Cardoso et al., 2014          | Revista latino-americana de enfermagem           | Music and 25% glucose pain relief for the premature infant: a randomized clinical trial.                                                                                                              | Control group with other interventions |
| Clark et al., 2017            | Canadian Journal of Music Therapy                | Pediatric Palliative Music Therapy: pain, Distress, and Contentment in Children With Developmental Delays Associated With Life-Threatening Severe Neurological Impairment.                            | Control group with other interventions |
| Colwell et al., 2013          | Journal of Pediatric Nursing                     | Impact of Music Therapy Interventions (Listening, Composition, Orff-Based) on the Physiological and Psychosocial Behaviors of Hospitalized Children: A Feasibility Study.                             | Control group with other interventions |
| Erickson Megel et al., 1998   | Issues in comprehensive pediatric nursing        | Children's responses to immunizations: lullabies as a distraction.                                                                                                                                    | Insufficient data                      |
| Gao et al., 2021              | Pain                                             | Effect of combined pharmacological, behavioral, and physical interventions for procedural pain on salivary cortisol and neurobehavioral development in preterm infants: a randomized controlled trial | Combinded therapy                      |
| Howard et al., 2020           | Acta Paediatrica                                 | No effect of a musical intervention on stress response to venepuncture in a neonatal population                                                                                                       | Control group with other interventions |
| Huang et al., 2021            | Journal of Cardiac Surgery                       | The music video therapy in postoperative analgesia in preschool children after cardiothoracic surgery                                                                                                 | Combinded therapy                      |
| Koenig et al., 2013           | The Journal of Pain                              | Specific music therapy techniques in the treatment of primary headache disorders in adolescents: A randomized attention-placebo-controlled trial                                                      | Control group with other interventions |
| Melo et al., 2017             | Revista brasileira de enfermagem                 | Non-pharmacological measures in preterm newborns submitted to arterial puncture.                                                                                                                      | Control group with other interventions |
| Nelson et al., 2017           | Pain management nursing                          | Relaxation Training and Postoperative Music Therapy for Adolescents Undergoing Spinal Fusion Surgery.                                                                                                 | Combinded therapy                      |
| Oelkers-Ax et al., 2008       | European Journal of Pain                         | Butterbur root extract and music therapy in the prevention of childhood migraine: an explorative study.                                                                                               | Insufficient data                      |
| Perkins et al., 2018          | Frontiers in oncology                            | Roadmap to wellness: Exploring live customized music at the bedside for hospitalized children.                                                                                                        | Insufficient data                      |
| Polat et al., 2015            | Indian Journal of Traditional Knowledge          | The effect of therapeutic music on anxiety in children with acute lymphoblastic leukaemia                                                                                                             | Insufficient data                      |
| Qiu et al., 2017              | BMC pediatrics                                   | Effect of combined music and touch intervention on pain response and beta-endorphin and cortisol concentrations in late preterm infants.                                                              | Combinded therapy                      |
| Rahlin et al., 2009           | Pediatric Physical Therapy                       | Effects of Music on Crying Behavior of Infants and Toddlers During Physical Therapy Intervention.                                                                                                     | Not RCT                                |
| Rossi et al., 2018            | Early human development                          | Music reduces pain perception in healthy newborns: A comparison between different music tracks and recoded heartbeat.                                                                                 | Insufficient data                      |
| Scheufler et al., 2021        | Journal of music therapy                         | Comparing Three Music Therapy Interventions for Anxiety and Relaxation in Youth With Amplified Pain                                                                                                   | Insufficient data                      |
| Scheufler et al., 2021        | Journal of music therapy                         | Comparing Three Music Therapy Interventions for Anxiety and Relaxation in Youth With Amplified Pain                                                                                                   | Control group with other interventions |
| Schwilling et al., 2015       | Acta Paediatrica                                 | Live music reduces stress levels in very low-birthweight infants.                                                                                                                                     | Not RCT                                |
| Shah et al., 2017             | The Journal of pediatrics                        | Trial of Music, Sucrose, and Combination Therapy for Pain Relief during Heel Prick Procedures in Neonates.                                                                                            | Control group with other interventions |
| Sobieraj et al., 2009         | Canadian Journal of Nursing Research Archive     | The effect of music on parental participation during pediatric laceration repair.                                                                                                                     | Insufficient data                      |
| Sundar et al., 2016           | Clinical pediatrics                              | Live Music Therapy as an Active Focus of Attention for Pain and Behavioral Symptoms of Distress During Pediatric Immunization                                                                         | Insufficient data                      |
| Uggla et al., 2018            | Acta paediatrica                                 | Music therapy supported the health-related quality of life for children undergoing haematopoietic stem cell transplants                                                                               | Insufficient data                      |
| Van Dokkum et al., 2020       | Frontiers in Pediatrics                          | Feasibility of Live-Performed Music Therapy for Extremely and Very Preterm Infants in a Tertiary NICU                                                                                                 | Not RCT                                |
| Viana et al., 2020            | Rev Rene                                         | Pain in full term newborns submitted to music and swaddling during venipunctures                                                                                                                      | Insufficient data                      |
| Whitehead-Pleaux et al., 2006 | Journal of music therapy                         | The effects of music therapy on pediatric patients' pain and anxiety during donor site dressing change.                                                                                               | Insufficient data                      |
| Whitehead-Pleaux et al., 2007 | Journal of music therapy                         | Exploring the effects of music therapy on pediatric pain: Phase 1                                                                                                                                     | Not RCT                                |

(1) Risk of bias graph; (2) Risk of bias summary.

**Fig S1.**  
Risk of bias graph: review authors' judgements about each risk of bias item presented as percentages across all included studies.

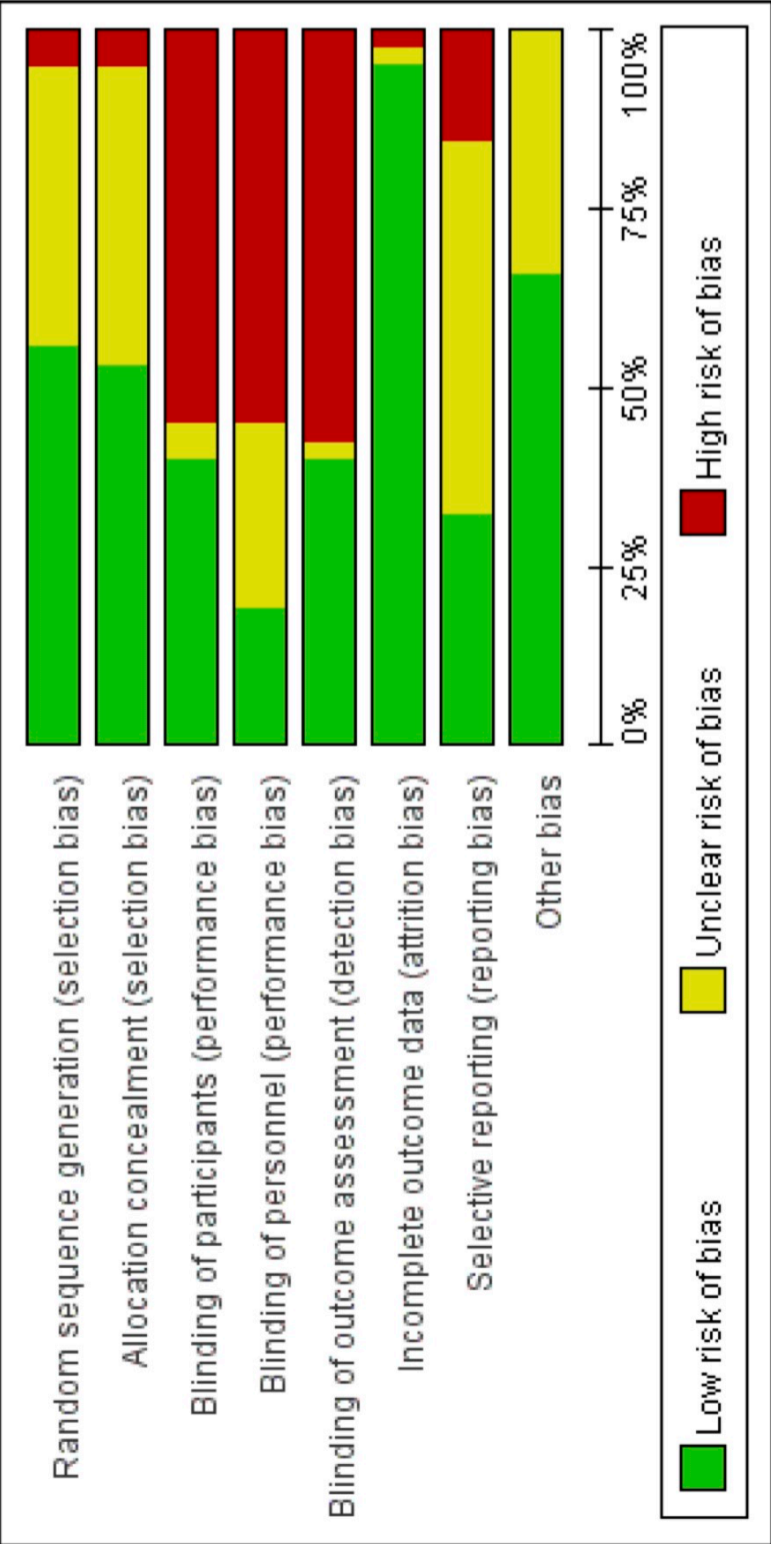

|                             | Random sequence generation (selection bias) | Allocation concealment (selection bias) | Blinding of participants (performance bias) | Blinding of personnel (performance bias) | Blinding of outcome assessment (detection bias) | Incomplete outcome data (attrition bias) | Selective reporting (reporting bias) | Other bias |
|-----------------------------|---------------------------------------------|-----------------------------------------|---------------------------------------------|------------------------------------------|-------------------------------------------------|------------------------------------------|--------------------------------------|------------|
| Antonelli et al. 2019       | ?                                           | ?                                       | +                                           | +                                        | +                                               | +                                        | ?                                    | ?          |
| Aydin et al. 2017           | +                                           | ?                                       | +                                           | +                                        | +                                               | +                                        | ?                                    | +          |
| Azeem et al. 2021           | ?                                           | ?                                       | ?                                           | ?                                        | ?                                               | ?                                        | +                                    | ?          |
| Badr et al. 2017            | ?                                           | +                                       | +                                           | ?                                        | +                                               | +                                        | +                                    | +          |
| Bakl et al. 2018            | ?                                           | +                                       | +                                           | +                                        | +                                               | +                                        | ?                                    | ?          |
| Balan et al. 2009           | +                                           | ?                                       | +                                           | +                                        | +                                               | +                                        | ?                                    | ?          |
| Barandouzi et al. 2019      | +                                           | +                                       | +                                           | +                                        | +                                               | +                                        | +                                    | +          |
| Bergomi et al. 2013         | ?                                           | ?                                       | +                                           | +                                        | +                                               | +                                        | ?                                    | ?          |
| Bulut et al. 2020           | +                                           | ?                                       | +                                           | ?                                        | +                                               | +                                        | ?                                    | ?          |
| Corrigan et al. 2020        | ?                                           | ?                                       | +                                           | ?                                        | +                                               | +                                        | ?                                    | +          |
| Dörra et al. 2021           | ?                                           | +                                       | +                                           | +                                        | +                                               | +                                        | +                                    | +          |
| Duymaz 2018                 | +                                           | +                                       | +                                           | +                                        | +                                               | +                                        | ?                                    | +          |
| Eid et al. 2020             | ?                                           | +                                       | +                                           | +                                        | +                                               | +                                        | +                                    | +          |
| Guerra et al. 2021          | +                                           | +                                       | +                                           | +                                        | +                                               | +                                        | +                                    | +          |
| Hartling et al. 2013        | +                                           | +                                       | +                                           | +                                        | +                                               | +                                        | +                                    | +          |
| Hatem et al. 2006           | +                                           | ?                                       | +                                           | ?                                        | +                                               | +                                        | ?                                    | ?          |
| Heijden et al. 2018         | +                                           | +                                       | +                                           | +                                        | +                                               | +                                        | +                                    | +          |
| Heijden et al. 2019         | +                                           | +                                       | +                                           | +                                        | +                                               | +                                        | +                                    | +          |
| Huang et al. 2021           | ?                                           | ?                                       | +                                           | +                                        | +                                               | +                                        | +                                    | +          |
| Konar et al. 2021           | +                                           | +                                       | +                                           | +                                        | +                                               | +                                        | +                                    | +          |
| Kristjánsdóttir et al. 2011 | +                                           | ?                                       | +                                           | +                                        | +                                               | +                                        | ?                                    | ?          |
| Kühlmann et al. 2020        | +                                           | +                                       | +                                           | +                                        | +                                               | +                                        | +                                    | +          |
| Lin et al. 2021             | ?                                           | ?                                       | +                                           | +                                        | +                                               | +                                        | +                                    | +          |
| Longhi et al. 2013          | ?                                           | ?                                       | +                                           | ?                                        | +                                               | +                                        | ?                                    | +          |
| Momenabadi et al. 2020      | +                                           | ?                                       | +                                           | ?                                        | +                                               | +                                        | +                                    | +          |
| Muzzi et al. 2021           | +                                           | +                                       | +                                           | +                                        | +                                               | +                                        | +                                    | +          |
| Nguyen et al. 2010          | ?                                           | +                                       | +                                           | +                                        | +                                               | +                                        | ?                                    | +          |
| Nilsson et al. 2009         | ?                                           | +                                       | +                                           | +                                        | +                                               | +                                        | ?                                    | +          |
| Noguchi et al. 2006         | +                                           | ?                                       | +                                           | ?                                        | +                                               | +                                        | ?                                    | ?          |
| Shabani et al. 2016         | ?                                           | ?                                       | +                                           | +                                        | +                                               | +                                        | +                                    | +          |
| Shukla et al. 2018          | +                                           | +                                       | ?                                           | +                                        | +                                               | +                                        | ?                                    | ?          |
| Suresh et al. 2015          | +                                           | +                                       | +                                           | ?                                        | +                                               | +                                        | ?                                    | ?          |
| Tang et al. 2018            | +                                           | ?                                       | +                                           | +                                        | +                                               | +                                        | ?                                    | +          |
| Tekgündüz et al. 2019       | ?                                           | +                                       | +                                           | +                                        | +                                               | +                                        | ?                                    | +          |
| Uematsu et al. 2019         | +                                           | +                                       | +                                           | +                                        | +                                               | +                                        | ?                                    | ?          |
| Yinger et al. 2016          | +                                           | +                                       | +                                           | ?                                        | +                                               | +                                        | ?                                    | ?          |
| Yu et al. 2009              | +                                           | +                                       | +                                           | +                                        | +                                               | +                                        | ?                                    | +          |
| Zhu et al. 2015             | +                                           | +                                       | +                                           | +                                        | +                                               | +                                        | ?                                    | +          |

**Fig S2.**  
Risk of bias summary: review authors' judgements about each risk of bias item for each included study.
